# Supplementary material
Source: Springer Nature journal article supplement (https://www.springermedizin.de/resource/supplementary/13063_2008_318_MOESM7_ESM.pdf/9617976)

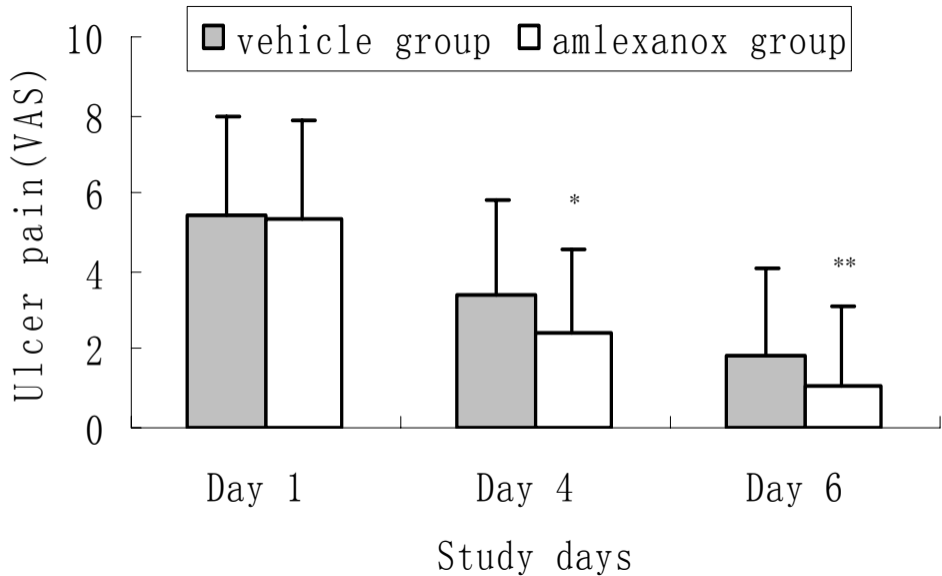

Supplement: MOESM7 [file 9617976]
